# Supplementary material for: Pro-death NMDA receptor signaling is promoted by the GluN2B C-terminus independently of Dapk1
Source: eLife. 2017 Jul 21;6:e17161. doi: 10.7554/eLife.17161 (PMC5544426; doi:10.7554/eLife.17161)
Supplement: Figure 1—source data 1. — DOI: http://dx.doi.org/10.7554/eLife.17161.003 [file elife-17161-fig1-data1.xlsx]

## Sheet: Sheet1
Control	OA+FK506	STS
1	1.96125	0.34826
1	1.48028	0.419568
1	1.01777	0.523573
1	1.89904	0.410512
1	0.792243
1	2.8418
1	1.36566
1	0.92342
