# Supplementary material for: Pro-death NMDA receptor signaling is promoted by the GluN2B C-terminus independently of Dapk1
Source: eLife. 2017 Jul 21;6:e17161. doi: 10.7554/eLife.17161 (PMC5544426; doi:10.7554/eLife.17161)
Supplement: Figure 1—source data 2. — DOI: http://dx.doi.org/10.7554/eLife.17161.004 [file elife-17161-fig1-data2.xlsx]

## Sheet: Sheet1
	con			5 min			30 min			60 min
20 µM NMDA	1	1	1	0.64309	1.24875	0.98576	0.61481	1.14516	1.00318	0.55728	1.07501	1.04375
50 µM NMDA	1	1	1	0.64137	1.15956	0.90841	0.2856	0.76991	0.69732	0.21814	0.38851	0.41834
BiC/4-AP	1	1	1	0.91947	0.654369	1.15146	0.98603	0.647099	1.13478	0.956132	0.497185	1.13524
