# Supplementary material for: Pro-death NMDA receptor signaling is promoted by the GluN2B C-terminus independently of Dapk1
Source: eLife. 2017 Jul 21;6:e17161. doi: 10.7554/eLife.17161 (PMC5544426; doi:10.7554/eLife.17161)
Supplement: Figure 1—source data 3. — DOI: http://dx.doi.org/10.7554/eLife.17161.005 [file elife-17161-fig1-data3.xlsx]

## Sheet: Sheet1
Ctr	5min	10min	20min	30min	1hr
1	0.972224	1.48398	1.18784	0.970533	0.52284
1	0.846995	1.04684	1.17069	1.13379	0.542323
1	0.83623	0.923227	0.482541	0.44314	0.370608
