# Supplementary material for: Pro-death NMDA receptor signaling is promoted by the GluN2B C-terminus independently of Dapk1
Source: eLife. 2017 Jul 21;6:e17161. doi: 10.7554/eLife.17161 (PMC5544426; doi:10.7554/eLife.17161)
Supplement: Figure 1—source data 4. — DOI: http://dx.doi.org/10.7554/eLife.17161.006 [file elife-17161-fig1-data4.xlsx]

## Sheet: Sheet1
	con			5 min			30 min			60 min
BiC/4-AP	1	1	1	0.91947	0.654369	1.15146	0.98603	0.647099	1.13478	0.956132	0.497185	1.13524
20 µM NMDA	1	1	1	1.06668	0.645574	1.23595	1.11987	0.660454	1.20071	1.12194	0.614822	1.03941
50 µM NMDA	1	1	1	0.85873	0.749042	1.15473	0.497405	0.35623	0.819417	0.28128	0.099482	0.477044
