# Supplementary material for: Pro-death NMDA receptor signaling is promoted by the GluN2B C-terminus independently of Dapk1
Source: eLife. 2017 Jul 21;6:e17161. doi: 10.7554/eLife.17161 (PMC5544426; doi:10.7554/eLife.17161)
Supplement: Figure 1—source data 5. — DOI: http://dx.doi.org/10.7554/eLife.17161.007 [file elife-17161-fig1-data5.xlsx]

## Sheet: Sheet1
	Con				OGD
Control	1	1	1	1	0.673994	0.323157	0.133709	0.376953
MK-801	1.20401	0.806596	0.794897	0.935169	1.16806	0.950454	1.29191	1.13681
