# Supplementary material for: Pro-death NMDA receptor signaling is promoted by the GluN2B C-terminus independently of Dapk1
Source: eLife. 2017 Jul 21;6:e17161. doi: 10.7554/eLife.17161 (PMC5544426; doi:10.7554/eLife.17161)
Supplement: Figure 1—source data 6. — DOI: http://dx.doi.org/10.7554/eLife.17161.008 [file elife-17161-fig1-data6.xlsx]

## Sheet: Sheet1
	WT				NMDA
WT	1.00004	0.942746	1.03663	1.02059	0.250155	0.183826	0.279019	0.141988
DAPK-/-	0.994351	1.07191	0.877146		0.282663	0.176829	0.0483983
