# Supplementary material for: Pro-death NMDA receptor signaling is promoted by the GluN2B C-terminus independently of Dapk1
Source: eLife. 2017 Jul 21;6:e17161. doi: 10.7554/eLife.17161 (PMC5544426; doi:10.7554/eLife.17161)
Supplement: Figure 2—source data 1. — DOI: http://dx.doi.org/10.7554/eLife.17161.011 [file elife-17161-fig2-data1.xlsx]

## Sheet: Sheet1
	DAPK+/+						DAPK-/-
Control	16.558	7.698	16.397	29.43	32.881	33.276	17.747	15.957	21.999	17.267	22.984	27.791
10uM	18.333	31.973	28.47	26.525	27.244	34.034	24.451	20.601	24.277	22.955	36.818	30.881
20uM	17.918	28.716	28.435	42.619	56.021	54.369	23.346	31.93	38.375	68.034	51.538	50.093
30uM	23.197	56.689	38.561	72.605	68.265	42.884	28.649	58.695	63.242	71.685	72.959	66.64
50uM	60.064	70.644	83.205	97.504	95.222	69.432	74.22	64.323	79.318	96.305	95.421	91.603
100uM	93.661	94.276	94.731	98.757	98.658	93.595	81.448	98.77	94.758	98.62	98.58	97.091
