# Supplementary material for: Pro-death NMDA receptor signaling is promoted by the GluN2B C-terminus independently of Dapk1
Source: eLife. 2017 Jul 21;6:e17161. doi: 10.7554/eLife.17161 (PMC5544426; doi:10.7554/eLife.17161)
Supplement: Figure 2—source data 2. — DOI: http://dx.doi.org/10.7554/eLife.17161.012 [file elife-17161-fig2-data2.xlsx]

## Sheet: Sheet1
	DAPK+/+					DAPK-/-
Ctr	22.0269	52.151	15.3399	14.1641		29.4025	22.2174	21.0212	26.6832	20.815
10uM	20.6862	22.506	24.0633	15.3573		25.4699	25.8224	35.6349	22.8793	26.0219
20uM	54.7822	52.5059	30.083	24.0687		40.73	72.1519	47.0124	30.0893	36.3074
30uM	70.741	71.1329	50.2298	37.4761		72.1233	80.8295	81.006	62.8513	45.597
50uM	89.6295	81.4389	73.3854	87.8445		92.3064	88.4121	90.7185	82.5572	83.0743
100uM	92.4692	95.6207	95.979	97.7953		94.4219	96.8682	94.4781	96.8455	95.7239
