# Supplementary material for: Pro-death NMDA receptor signaling is promoted by the GluN2B C-terminus independently of Dapk1
Source: eLife. 2017 Jul 21;6:e17161. doi: 10.7554/eLife.17161 (PMC5544426; doi:10.7554/eLife.17161)
Supplement: Figure 2—source data 3. — DOI: http://dx.doi.org/10.7554/eLife.17161.013 [file elife-17161-fig2-data3.xlsx]

## Sheet: Sheet1
	DAPK+/+				DAPK-/-
Ctr	24.6128	29.7527	34.4121	33.5708	24.2953	43.6298	35.2827	32.7591
OGD	76.2167	83.5641	63.0416	49.2079	70.9811	80.0766	68.0894	65.9325
