# Supplementary material for: Pro-death NMDA receptor signaling is promoted by the GluN2B C-terminus independently of Dapk1
Source: eLife. 2017 Jul 21;6:e17161. doi: 10.7554/eLife.17161 (PMC5544426; doi:10.7554/eLife.17161)
Supplement: Figure 2—source data 4. — DOI: http://dx.doi.org/10.7554/eLife.17161.014 [file elife-17161-fig2-data4.xlsx]

## Sheet: Sheet1
DAPK+/+	DAPK-/-
97.9921	165.307
225.668	92.5274
79.3624	176.361
117.243	206.168
30.9253	265.908
48.8098	115.131
40.3095	21.1136
140.993	139.971
70.4517	34.2786
150.171	82.9642
98.0745	108.797
142.845	139.35
58.6479	96.1292
73.5733	83.9578
55.3995	204.678
169.535	122.087
	68.6814
	63.8834
	87.7272
	96.7249
	81.2489
	150.441
	65.0571
	81.3872
	119.754
