# Supplementary material for: Pro-death NMDA receptor signaling is promoted by the GluN2B C-terminus independently of Dapk1
Source: eLife. 2017 Jul 21;6:e17161. doi: 10.7554/eLife.17161 (PMC5544426; doi:10.7554/eLife.17161)
Supplement: Figure 2—source data 5. — DOI: http://dx.doi.org/10.7554/eLife.17161.015 [file elife-17161-fig2-data5.xlsx]

## Sheet: Sheet1
avgerage CA1/2			CA1			CA2
DAPK+/+	DAPK-/-		DAPK+/+	DAPK-/-		DAPK+/+	DAPK-/-
39.398	70.5105		28.3069	47.8721		50.4891	93.149
3.5	5.30148		0	1.84106		7	8.76191
48.1968	47.4774		47.8676	50		48.526	44.9548
50	0.223214		50	0.446429		50	0
42.5494	94.2637		48.1925	93.2454		36.9064	95.2821
52.465	29.3448		50	48.4938		54.93	10.1958
20.202	88.5476		22.9798	84.5943		17.4242	92.5008
10.5758	80.6385		4.48495	87.1429		16.6667	74.1342
12.4723	36.2497		8.87769	6.59032		16.067	65.9091
52.7937	24.1266		40.3699	40.783		65.2174	7.47029
10.9648	26.3059		4.83871	1.99634		17.0909	50.6154
9.58844	10.871		5.09793	8.67388		14.079	13.0682
13.9545	6.32184		6.81004	0.862069		21.0989	11.7816
22.9767	16.0397		13.9952	0.862069		31.9581	31.2174
	0			0			0
	3.95758			2.50975			5.40541
