# Supplementary material for: Pro-death NMDA receptor signaling is promoted by the GluN2B C-terminus independently of Dapk1
Source: eLife. 2017 Jul 21;6:e17161. doi: 10.7554/eLife.17161 (PMC5544426; doi:10.7554/eLife.17161)
Supplement: Figure 3—source data 1. — DOI: http://dx.doi.org/10.7554/eLife.17161.017 [file elife-17161-fig3-data1.xlsx]

## Sheet: Sheet1
Con		50 µM NR2Bct peptide
mean	sem	mean	sem
14.3365	1.75733	49.2557	1.11742
