# Supplementary material for: Pro-death NMDA receptor signaling is promoted by the GluN2B C-terminus independently of Dapk1
Source: eLife. 2017 Jul 21;6:e17161. doi: 10.7554/eLife.17161 (PMC5544426; doi:10.7554/eLife.17161)
Supplement: Figure 3—source data 2. — DOI: http://dx.doi.org/10.7554/eLife.17161.018 [file elife-17161-fig3-data2.xlsx]

## Sheet: Sheet1
	No peptide				Scrambled NR2Bct				NR2Bct
Ctr	16.6591	13.4779	12.6697		20.3038	17.3241	15.8897		23.8525	13.1613	14.942
10uM	25.6785	17.2438	14.2419		29.3082	13.726	12.0067		26.2761	17.3201	17.6738
20uM	35.8869	43.4325	47.1029		25.9261	14.6161	13.2093		25.5024	14.5185	16.506
30uM	38.5522	76.0126	74.7704		31.5845	18.5342	22.6495		27.9704	21.3253	15.249
50uM	84.7435	92.5816	92.3041		48.5584	27.9642	32.0367	30.9484	29.5408	31.2005	26.7584	21.5045
100uM	87.2229	99.2138	96.544		64.6915	48.6249	48.8194	32.6083	33.2626	38.7721	33.5725	25.694
