# Supplementary material for: Pro-death NMDA receptor signaling is promoted by the GluN2B C-terminus independently of Dapk1
Source: eLife. 2017 Jul 21;6:e17161. doi: 10.7554/eLife.17161 (PMC5544426; doi:10.7554/eLife.17161)
Supplement: Figure 3—source data 3. — DOI: http://dx.doi.org/10.7554/eLife.17161.019 [file elife-17161-fig3-data3.xlsx]

## Sheet: Sheet1
NMDA Alone	NR2Bct Peptide	NR2Bct Scramble Peptide	Arg-rich peptide	Neutral peptide
20	74	75	90	26.66
26	73	60	81	43.21
14	77	53	64	31.4
-6	65	40	77	36.63
5	70	62	60	34.4
14	64	62	81	32.98
13	73	70	80	30.35
11	66	63	70	29.78
