# Supplementary material for: Pro-death NMDA receptor signaling is promoted by the GluN2B C-terminus independently of Dapk1
Source: eLife. 2017 Jul 21;6:e17161. doi: 10.7554/eLife.17161 (PMC5544426; doi:10.7554/eLife.17161)
Supplement: Figure 3—source data 4. — DOI: http://dx.doi.org/10.7554/eLife.17161.020 [file elife-17161-fig3-data4.xlsx]

## Sheet: Sheet1
	zero Mg2+							1 mM Mg2+
0.5 µM	55.12	61.96	44.33	39.46	73.75	53.69		18.32	11.72	30.31	18.61	15.48	14.99
5 µM	68.12	68.36	57.86	54.65	49.07	46.25	57.85	48.29	33.29	30.86	45.6	2.77	39.53	17.2
