# Supplementary material for: Pro-death NMDA receptor signaling is promoted by the GluN2B C-terminus independently of Dapk1
Source: eLife. 2017 Jul 21;6:e17161. doi: 10.7554/eLife.17161 (PMC5544426; doi:10.7554/eLife.17161)
Supplement: Figure 3—source data 5. — DOI: http://dx.doi.org/10.7554/eLife.17161.021 [file elife-17161-fig3-data5.xlsx]

## Sheet: Sheet1
	closed-closed										closed-open
pre	1	1	1	1	1	1	1	1			1	1	1	1	1	1	1	1	1
post-1	0.748788	1.02844	0.709296	0.823121	0.626685	0.581625	0.837826	0.748299			0.809019	0.387821	0.560241	0.897075	0.617021	0.6287	0.706511	1.15073	1.02764
post-2	1.0485	0.996587	0.893683	0.92988	0.709569	0.716021	1.07217	1.03401			0.410256	0.307692	0.38253	0.464789	0.474632	0.436937	0.455782	0.619679	0.525077
